# Supplementary material for: Excavating hidden adsorption sites in metal-organic frameworks using rational defect engineering
Source: PubMed Central journal article supplement (PMC5691151; doi:10.1038/s41467-017-01478-4), 2017-11-16
Supplement: 41467_2017_1478_MOESM3_ESM.pdf [file 41467_2017_1478_MOESM3_ESM.pdf]

## Description of Additional Supplementary Files

File Name: Supplementary Data 1

Description: Crystallographic Information File that contains the relaxed configuration of pristine ABEMIF.

File Name: Supplementary Data 2

Description: Crystallographic Information File that contains the relaxed configuration of defective ABEMIF with modulators.

File Name: Supplementary Data 3

Description: Crystallographic Information File that contains the relaxed configuration of defective ABEMIF with water & OH.

File Name: Supplementary Data 4

Description: Crystallographic Information File that contains the relaxed configuration of pristine AXUBOL.

File Name: Supplementary Data 5

Description: Crystallographic Information File that contains the relaxed configuration of defective AXUBOL with modulators replacing BDC linker.

File Name: Supplementary Data 6

Description: Crystallographic Information File that contains the relaxed configuration of defective AXUBOL with water & OH replacing BDC linker.

File Name: Supplementary Data 7

Description: Crystallographic Information File that contains the relaxed configuration of defective AXUBOL with modulators replacing IN linker.

File Name: Supplementary Data 8

Description: Crystallographic Information File that contains the relaxed configuration of defective AXUBOL with water & OH replacing IN linker.

File Name: Supplementary Data 9

Description: Crystallographic Information File that contains the relaxed configuration of pristine HOMZEP.

File Name: Supplementary Data 10

Description: Crystallographic Information File that contains the relaxed configuration of defective HOMZEP with modulators.

File Name: Supplementary Data 11

Description: Crystallographic Information File that contains the relaxed configuration of defective HOMZEP with water & OH.

File Name: Supplementary Data 12

Description: Crystallographic Information File that contains the relaxed configuration of pristine JEWYAM.

File Name: Supplementary Data 13

Description: Crystallographic Information File that contains the relaxed configuration of defective JEWYAM with modulators.

File Name: Supplementary Data 14

Description: Crystallographic Information File that contains the relaxed configuration of defective JEWYAM with water & OH.

File Name: Supplementary Data 15

Description: Crystallographic Information File that contains the relaxed configuration of pristine KOCWEF.

File Name: Supplementary Data 16

Description: Crystallographic Information File that contains the relaxed configuration of defective KOCWEF with modulators replacing Linker 1.

File Name: Supplementary Data 17

Description: Crystallographic Information File that contains the relaxed configuration of defective KOCWEF with water & OH replacing Linker 1.

File Name: Supplementary Data 18

Description: Crystallographic Information File that contains the relaxed configuration of defective KOCWEF with modulators replacing Linker 2.

File Name: Supplementary Data 19

Description: Crystallographic Information File that contains the relaxed configuration of defective KOCWEF with water & OH replacing Linker 2.

File Name: Supplementary Data 20

Description: Crystallographic Information File that contains the relaxed configuration of pristine MUWQEB.

File Name: Supplementary Data 21

Description: Crystallographic Information File that contains the relaxed configuration of defective MUWQEB with modulators.

File Name: Supplementary Data 22

Description: Crystallographic Information File that contains the relaxed configuration of defective MUWQEB with water & OH.

File Name: Supplementary Data 23

Description: Crystallographic Information File that contains the relaxed configuration of pristine PAMHIW.

File Name: Supplementary Data 24

Description: Crystallographic Information File that contains the relaxed configuration of defective PAMHIW with modulators.

File Name: Supplementary Data 25

Description: Crystallographic Information File that contains the relaxed configuration of defective PAMHIW with water & OH.

File Name: Supplementary Data 26

Description: Crystallographic Information File that contains the relaxed configuration of pristine QAGQEW.

File Name: Supplementary Data 27

Description: Crystallographic Information File that contains the relaxed configuration of defective QAGQEW with modulators.

File Name: Supplementary Data 28

Description: Crystallographic Information File that contains the relaxed configuration of defective QAGQEW with water & OH.

File Name: Supplementary Data 29

Description: Crystallographic Information File that contains the relaxed configuration of pristine REGYOT.

File Name: Supplementary Data 30

Description: Crystallographic Information File that contains the relaxed configuration of defective REGYOT with modulators.

File Name: Supplementary Data 31

Description: Crystallographic Information File that contains the relaxed configuration of defective REGYOT with water & OH.

File Name: Supplementary Data 32

Description: Crystallographic Information File that contains the relaxed configuration of pristine UTEWOG.

File Name: Supplementary Data 33

Description: Crystallographic Information File that contains the relaxed configuration of defective UTEWOG with modulators.

File Name: Supplementary Data 34

Description: Crystallographic Information File that contains the relaxed configuration of defective UTEWOG with water & OH.

File Name: Supplementary Data 35

Description: Crystallographic Information File that contains the relaxed configuration of pristine UTEWUM.

File Name: Supplementary Data 36

Description: Crystallographic Information File that contains the relaxed configuration of defective UTEWUM with modulators.

File Name: Supplementary Data 37

Description: Crystallographic Information File that contains the relaxed configuration of defective UTEWUM with water & OH.

File Name: Supplementary Data 38

Description: Crystallographic Information File that contains the relaxed configuration of pristine VEXYON.

File Name: Supplementary Data 39

Description: Crystallographic Information File that contains the relaxed configuration of defective VEXYON with modulators.

File Name: Supplementary Data 40

Description: Crystallographic Information File that contains the relaxed configuration of defective VEXYON with water & OH.

File Name: Supplementary Data 41

Description: Crystallographic Information File that contains the relaxed configuration of pristine XENZUN.

File Name: Supplementary Data 42

Description: Crystallographic Information File that contains the relaxed configuration of defective XENZUN with modulators.

File Name: Supplementary Data 43

Description: Crystallographic Information File that contains the relaxed configuration of defective XENZUN with water & OH.
